# Supplementary material for: Oxidation–acidity synergism in Pt–HSiW/CeO 2 catalysts: effects of Pt loading on chlorobenzene degradation pathways and by-product inhibition
Source: Royal Society of Chemistry journal article supplement (doi:10.1039/d5cy00803d), 2025-11-20
Supplement: d5cy00803d1.pdf [file d5cy00803d1.pdf]

## **Oxidation-acid synergism in Pt-HSiW/CeO<sub>2</sub> catalysts: effect of Pt loading on chlorobenzene degradation pathway and by-product inhibition**

Zhenzhen Huang <sup>a</sup>, Haiyang Li <sup>b</sup>, Min Zhou <sup>d</sup>, Xuejun Zhang <sup>b</sup>, Huixin Yu <sup>b\*</sup>, Yanli Mao <sup>a</sup>, Wei Liu <sup>c</sup>, Deming Gu <sup>a\*\*</sup>, Xi Chen <sup>b</sup>, Zhongxian Song <sup>a\*\*\*</sup>

<sup>a</sup> Faculty of Environmental and Municipal Engineering, Key Laboratory of Carbon Emission Reduction and Combined Air Pollution Control Technology, Henan Key Laboratory of Water Pollution Control and Rehabilitation Technology, Henan University of Urban Construction, Pingdingshan, People's Republic of China

<sup>b</sup> College of Environmental and Safety Engineering, Shenyang Key Laboratory of Chemical Pollution Control, Shenyang University of Chemical Technology, Shenyang 110142, People's Republic of China

<sup>c</sup> College of Science, Shenyang University of Chemical Technology, Shenyang 110142, People's Republic of China

<sup>d</sup> Henan Provincial Natural Resources Monitoring and Land Rectification Institute

Corresponding Authors:

\* Huixin Yu Email: yuhuixin0619@126.com

\*\* Deming Gu Email: goodmingaust@163.com

\*\*\* Zhongxian Song Email: songzhongxian@126.com

## Support information

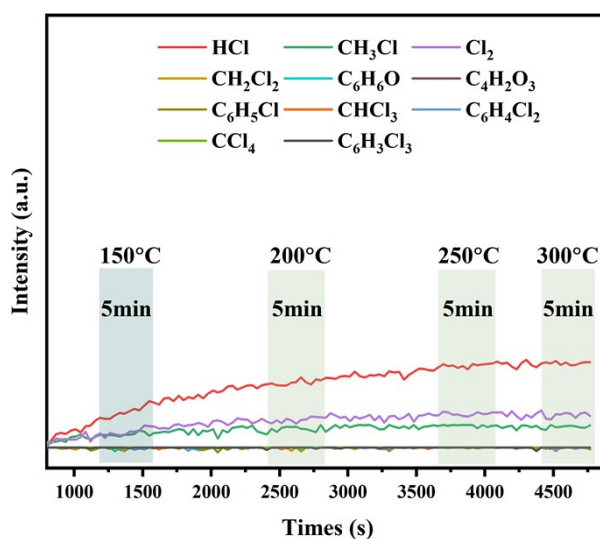

**Fig. S1** GC-MS spectrum of intermediate products in Cat-2.0 sample as a function of temperature

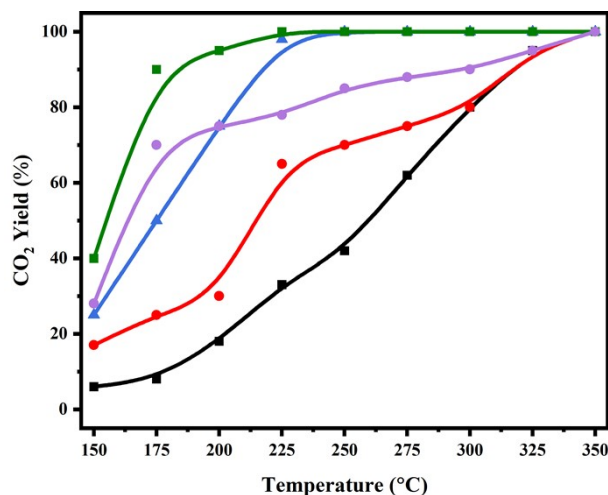

**Fig. S2** CO<sub>2</sub> yield of the catalysts

As shown in Fig. S1, GC-MS analysis indeed observed HCl, Cl<sub>2</sub>, and CH<sub>3</sub>Cl as the primary products, with other polychlorinated byproducts present at lower concentrations. While the presence of these byproducts indicated some degree of chloride generation, their quantities did not reach levels that posed a significant threat to environmental safety and sustainability. Furthermore, CO<sub>2</sub> selectivity testing provided additional evidence regarding the reaction pathway of chlorobenzene conversion and the relationship between catalysts activity and byproduct formation (Fig. S2). Although a lag phenomenon was indeed observed in the reaction,

potentially related to the asynchronous conversion process from chlorobenzene to CO<sub>2</sub>, the generation of byproducts did not significantly affect the long-term performance of the catalyst.
